# Supplementary material for: Chemometric-guided chemical marker selection: A case study of the heat-clearing herb Scrophularia ningpoensis
Source: Frontiers journal article supplement (doi:10.3389/fpls.2023.1153710), 2023-03-17
Supplement: Data_Sheet_1.PDF [file Data_Sheet_1.PDF]

## Chemometric-Guided Chemical Marker Selection: A Case Study Of The Heat-Clearing Herb *Scrophularia ningpoensis*

Lung-Shuo Wang<sup>1,2</sup>, Po-Jen Chen<sup>3,†</sup>, Wen-Chi Cheng<sup>4,†</sup>, Yu-Chia Chang<sup>5,6,†</sup>, Mohamed El-Shazly<sup>7</sup>, Lo-Yun Chen<sup>4</sup>, Bo-Rong Peng<sup>4</sup>, Chun-Han Su<sup>8</sup>, Pei-Tzu Yen<sup>9,10</sup>, Tsong-Long Hwang<sup>5,6,11,12,13,\*</sup> and Kuei-Hung Lai<sup>4,14,15,\*</sup>

### Contents

**Table S1.** The Inh% of superoxide generation of the *S. ningpoensis* fractions (20 µg/ml)

**Figure S1.** The high-performance liquid chromatography (HPLC) bioassay profiling was performed using the retention time-based fractionation approach together with the assessment of neutrophilic inhibition (anti-superoxide anion generation).

**Figure S2.** The bioactivity score (BS) calculations of selective clusters.

**Table S1.** The Inh% of superoxide generation of the *S. ningpoensis* fractions (20 µg/ml)

| Sample  | Superoxide anion<br>Inh% |    |
|---------|--------------------------|----|
| SN-EW-1 | 6.31±5.23                |    |
| SN-EW-2 | 15.72±6.06               |    |
| SN-EW-3 | 21.19±6.50               | *  |
| SN-EW-4 | 34.94±6.44               | ** |
| SN-EW-5 | 24.36±6.87               | *  |
| SN-EW-6 | 19.01±5.74               | *  |
| SN-EW-7 | 35.38±5.80               | ** |
| SN-EW-8 | 16.80±2.48               | ** |
| SN-EW-9 | 7.08±4.17                |    |

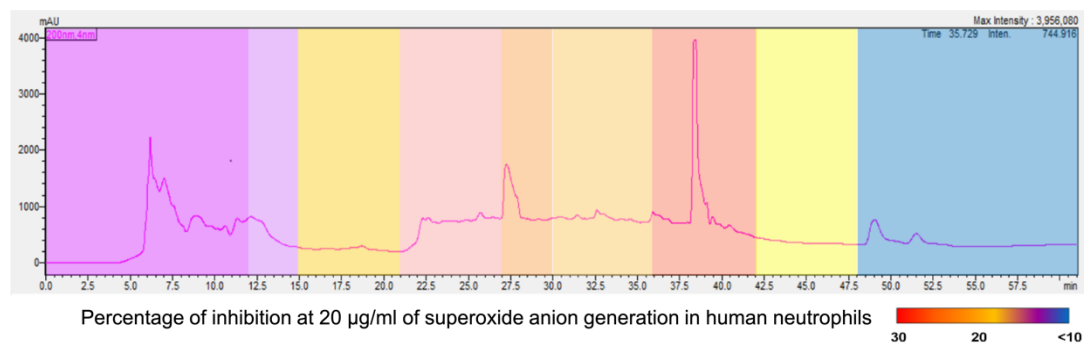

**Figure S1.** The high-performance liquid chromatography (HPLC) bioassay profiling was performed using the retention time-based fractionation approach together with the assessment of neutrophilic inhibition (anti-superoxide anion generation).

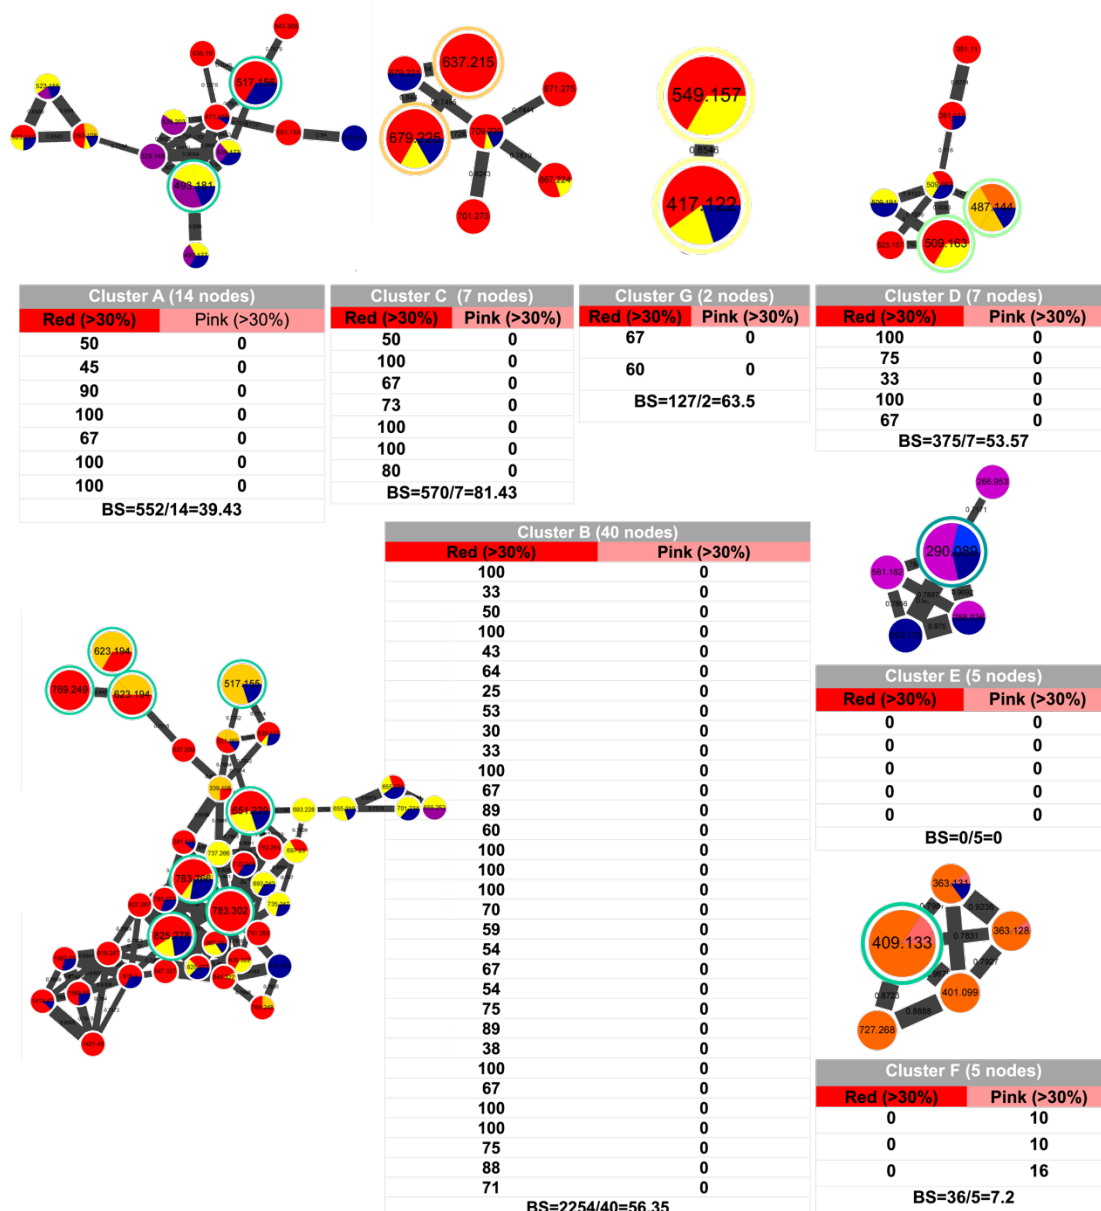

Figure S2. The bioactivity score (BS) calculations of selective clusters.
